# Supplementary material
Source: publisher figshare collection journal article supplement (https://gsajournals.figshare.com/ndownloader/files/15130205)
Supplement: Supplementary file 1 [file 15130205]

### **High quality draft genome of Arogyapacha *(Trichopus zeylanicus*), an important medicinal plant endemic to Western Ghats of India**

### Biju Vadakkemukadiyil Chellappan, Shidhi PR, Sheethal Vijayan, Veena S Rajan, Anu Sasi, Achuthsankar S. Nair

Department of Computational Biology and Bioinformatics, University of Kerala, Thiruvananthapuram, Kerala, India

Supplementary Figures


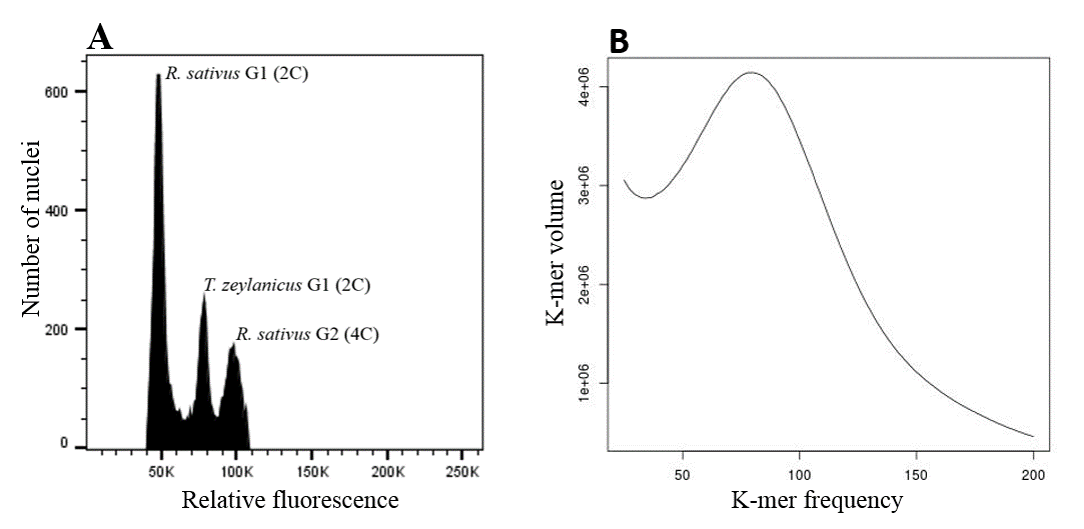


**Figure S1. Estimation of absolute nuclear DNA amount (genome size) in *T. zeylanicus.*** A. Flow cytometry method. B. K-mer frequency method


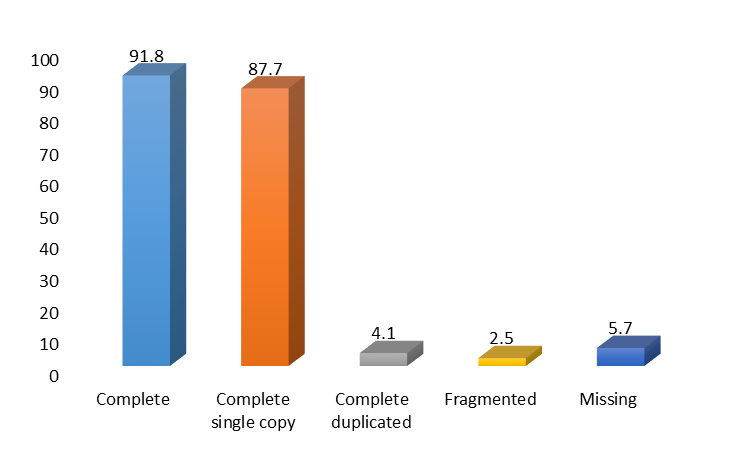


**Figure S2. BUSCO Analysis of *T. zeylanicus* genome assembly**. 1440 conserved orthologous gene sets were searched against the genome assembly. The number above each bar indicates the percentage of buscos.


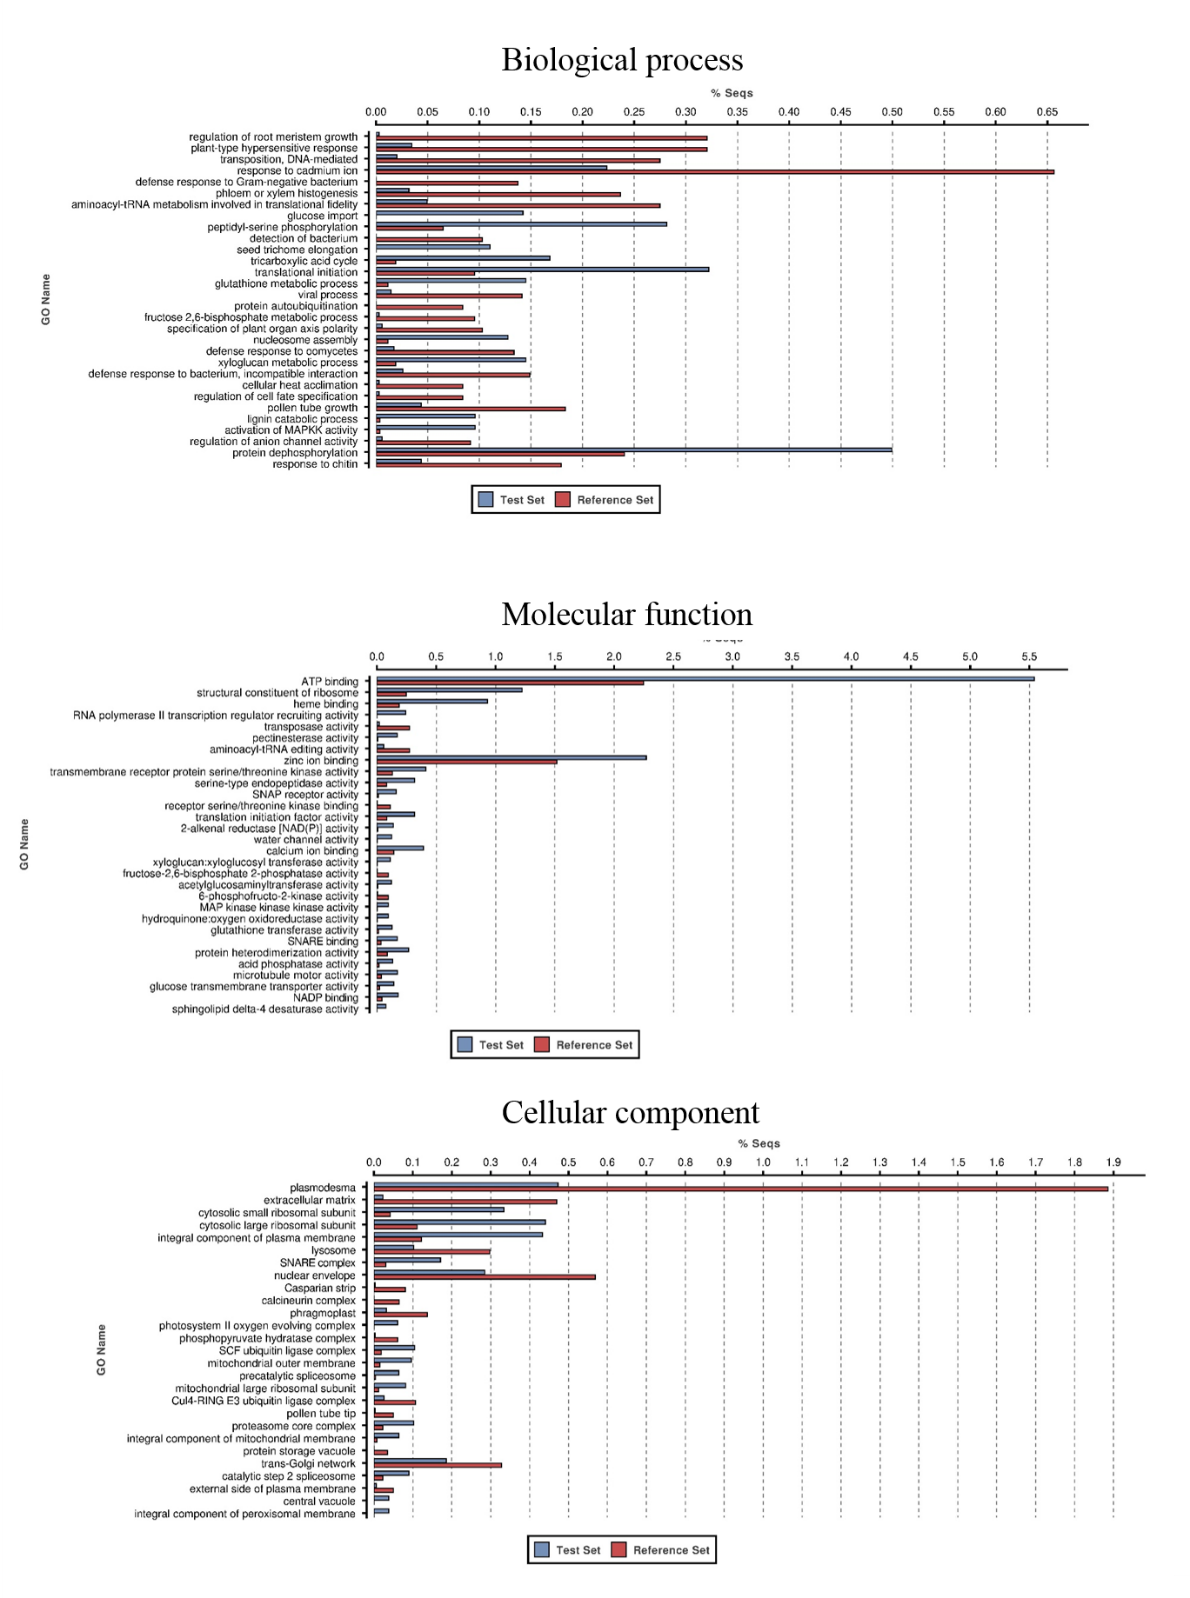


**Figure S3.  Gene ontology enrichment in *T. zeylanicus* complete gene set**. GO enrichment analysis of complete gene set in *T. zeylanicus* was performed using two tailed Fisher's exact test (P value < 0.001). Percentage of enriched GO terms statistically significant with respect to a reference set of *D. rotundata* complete gene set are shown.


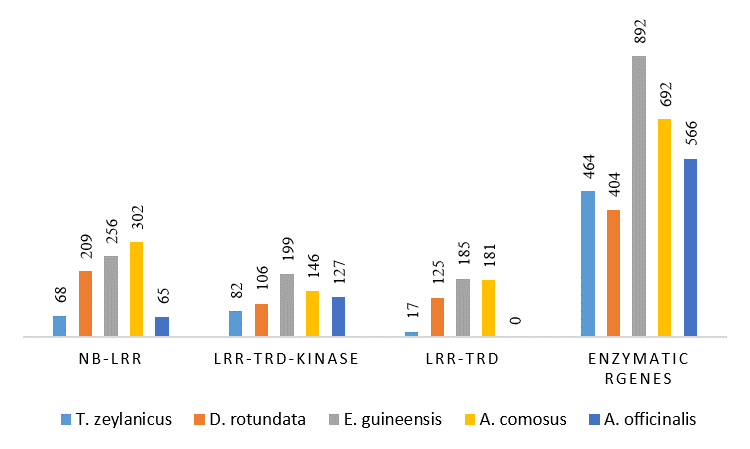


**Figure S4. Comparison of the number of disease resistance gene families in *T. zeylanicus* to its closely related species.**

**Figure S5 –S8 legends (because of the large size these figures uploaded separately)**

**Figure S5. Dot plot showing the collinearity between *T. zeylanicus* and *E. Guineensis.*** Each dot represents collinear pair

**Figure S6. Dot plot showing the collinearity between *T. zeylanicus* and *A. comosus.*** Each dot represents collinear pair

**Figure S7. Dot plot showing the collinearity between *T. zeylanicus* and *A. officinalis.*** Each dot represents collinear pair

**Figure S8. Dot plot showing the collinearity between *T. zeylanicus* and *D. rotundata.*** Each dot represents collinear pair
